# Supplementary material
Source: MDPI journal article supplement (https://www.mdpi.com/2073-4441/12/12/3306)
Supplement: s1 [file s1]

## Sheet: Sheet1
Data	Entrance	Black bridge	Peace bridge	Kongqi River	Entrance	Black bridge	Sparking Lake	Peace bridge	Mirror Lake	Kongqi River	Colorful Pond	Changhai Lake	Amout of precipitation
Unit	m3/s				m								mm
2017-01-01	7.97	8.88	3.6	3.37	1998.11	2188.39	2211.67	2307.02	2366.1	2461.99	3004.15	3074.75	0
2017-01-02	7.97	8.77	3.57	3.31	1998.11	2188.39	2211.67	2307.02	2366.1	2461.99	3004.12	3074.7	0
2017-01-03	7.91	8.65	3.53	3.3	1998.11	2188.38	2211.67	2307.02	2366.1	2461.99	3004.09	3074.66	0
2017-01-04	7.72	8.64	3.5	3.3	1998.1	2188.38	2211.66	2307.02	2366.1	2461.99	3004.06	3074.62	0
2017-01-05	7.71	8.56	3.46	3.23	1998.1	2188.38	2211.66	2307.02	2366.1	2461.98	3004.03	3074.58	0
2017-01-06	7.71	8.56	3.45	3.2	1998.1	2188.38	2211.66	2307.02	2366.1	2461.98	3003.99	3074.53	0
2017-01-07	7.71	8.56	3.5	3.2	1998.1	2188.38	2211.65	2307.02	2366.1	2461.98	3003.95	3074.49	0
2017-01-08	7.62	8.56	3.5	3.15	1998.1	2188.38	2211.65	2307.02	2366.09	2461.98	3003.92	3074.45	0
2017-01-09	7.46	8.56	3.48	3.1	1998.09	2188.38	2211.65	2307.02	2366.1	2461.97	3003.89	3074.41	0
2017-01-10	7.46	8.56	3.5	3.09	1998.09	2188.38	2211.65	2307.02	2366.1	2461.97	3003.86	3074.37	0.4
2017-01-11	7.46	8.56	3.5	3.02	1998.09	2188.38	2211.64	2307.02	2366.11	2461.96	3003.83	3074.33	0
2017-01-12	7.46	8.51	3.46	2.99	1998.09	2188.38	2211.64	2307.02	2366.11	2461.96	3003.8	3074.29	1.4
2017-01-13	7.46	8.36	3.38	2.99	1998.09	2188.37	2211.64	2307.01	2366.1	2461.96	3003.78	3074.24	0
2017-01-14	7.46	8.33	3.45	2.93	1998.09	2188.37	2211.64	2307.02	2366.1	2461.95	3003.75	3074.2	0
2017-01-15	7.33	8.34	3.35	2.91	1998.08	2188.37	2211.63	2307.01	2366.1	2461.95	3003.72	3074.16	0
2017-01-16	7.21	8.29	3.31	2.89	1998.08	2188.37	2211.63	2307.01	2366.1	2461.95	3003.68	3074.12	0
2017-01-17	7.21	8.29	3.31	2.87	1998.08	2188.37	2211.63	2307.01	2366.1	2461.95	3003.65	3074.07	0
2017-01-18	7.21	8.25	3.31	2.81	1998.08	2188.37	2211.62	2307.01	2366.1	2461.94	3003.63	3074.03	0
2017-01-19	7.21	8.1	3.31	2.8	1998.08	2188.36	2211.62	2307.01	2366.1	2461.94	3003.6	3073.99	0
2017-01-20	7.21	8.02	3.29	2.78	1998.08	2188.36	2211.62	2307.01	2366.1	2461.94	3003.58	3073.95	0
2017-01-21	7.21	7.99	3.14	2.72	1998.08	2188.36	2211.62	2307	2366.09	2461.93	3003.56	3073.9	0
2017-01-22	7.16	7.84	3.12	2.68	1998.08	2188.35	2211.62	2307	2366.09	2461.93	3003.53	3073.87	0
2017-01-23	6.98	7.79	3.08	2.7	1998.07	2188.35	2211.62	2307	2366.09	2461.93	3003.5	3073.82	0
2017-01-24	6.97	7.71	2.99	2.68	1998.07	2188.35	2211.62	2306.99	2366.09	2461.93	3003.47	3073.78	0
2017-01-25	6.97	7.57	2.98	2.62	1998.07	2188.34	2211.62	2306.99	2366.09	2461.92	3003.45	3073.74	0
2017-01-26	6.97	7.57	2.98	2.59	1998.07	2188.34	2211.62	2306.99	2366.08	2461.92	3003.42	3073.69	0
2017-01-27	6.94	7.57	3.07	2.59	1998.07	2188.34	2211.61	2307	2366.07	2461.92	3003.4	3073.65	0
2017-01-28	6.76	7.54	3	2.52	1998.06	2188.34	2211.61	2306.99	2366.08	2461.91	3003.36	3073.61	0
2017-01-29	6.74	7.54	3.05	2.51	1998.06	2188.34	2211.61	2307	2366.08	2461.91	3003.34	3073.57	0
2017-01-30	6.74	7.49	2.93	2.5	1998.06	2188.34	2211.61	2306.99	2366.08	2461.91	3003.31	3073.53	0
2017-01-31	6.74	7.49	2.93	2.49	1998.06	2188.34	2211.61	2306.99	2366.08	2461.91	3003.29	3073.49	0
2017-02-01	6.59	7.49	2.9	2.42	1998.05	2188.34	2211.6	2306.99	2366.08	2461.9	3003.27	3073.45	0
2017-02-02	6.52	7.49	2.93	2.42	1998.05	2188.34	2211.6	2306.99	2366.08	2461.9	3003.26	3073.41	0
2017-02-03	6.52	7.43	2.81	2.41	1998.05	2188.34	2211.6	2306.98	2366.07	2461.9	3003.24	3073.37	0
2017-02-04	6.52	7.33	2.65	2.42	1998.05	2188.33	2211.6	2306.98	2366.07	2461.9	3003.21	3073.33	0
2017-02-05	6.52	7.27	2.6	2.41	1998.05	2188.33	2211.59	2306.97	2366.06	2461.9	3003.18	3073.29	0
2017-02-06	6.52	7.24	2.69	2.35	1998.05	2188.33	2211.59	2306.98	2366.07	2461.89	3003.16	3073.24	0
2017-02-07	6.52	7.24	2.92	2.33	1998.05	2188.33	2211.59	2306.99	2366.06	2461.89	3003.13	3073.2	0
2017-02-08	6.37	7.27	2.93	2.26	1998.04	2188.33	2211.59	2306.99	2366.07	2461.88	3003.11	3073.17	0
2017-02-09	6.23	7.24	2.88	2.25	1998.04	2188.33	2211.59	2306.99	2366.07	2461.88	3003.08	3073.12	0
2017-02-10	6.23	7.24	2.74	2.22	1998.04	2188.33	2211.58	2306.98	2366.07	2461.88	3003.06	3073.08	0
2017-02-11	6.23	7.18	2.71	2.15	1998.04	2188.33	2211.58	2306.98	2366.08	2461.87	3003.03	3073.04	0
2017-02-12	6.23	7.05	2.65	2.18	1998.04	2188.32	2211.58	2306.97	2366.08	2461.87	3003.01	3073	0
2017-02-13	6.23	6.99	2.57	2.13	1998.04	2188.32	2211.58	2306.97	2366.07	2461.87	3002.98	3072.96	0
2017-02-14	6.2	6.99	2.6	2.09	1998.04	2188.32	2211.58	2306.97	2366.07	2461.86	3002.95	3072.91	0
2017-02-15	6.03	6.93	2.52	2.09	1998.03	2188.32	2211.57	2306.97	2366.06	2461.86	3002.92	3072.85	0
2017-02-16	6.03	6.8	2.4	2.09	1998.03	2188.31	2211.57	2306.96	2366.07	2461.86	3002.89	3072.82	0
2017-02-17	6.03	6.81	2.42	2.09	1998.03	2188.31	2211.56	2306.96	2366.06	2461.86	3002.86	3072.77	0
2017-02-18	6.03	6.8	2.45	2.09	1998.03	2188.31	2211.56	2306.96	2366.06	2461.86	3002.83	3072.73	0
2017-02-19	6.03	6.82	2.5	2.09	1998.03	2188.31	2211.56	2306.97	2366.06	2461.86	3002.81	3072.69	0
2017-02-20	6.03	6.8	2.47	2.09	1998.03	2188.31	2211.56	2306.97	2366.06	2461.86	3002.78	3072.64	0
2017-02-21	6.03	6.92	2.59	2.08	1998.03	2188.32	2211.56	2306.97	2366.06	2461.86	3002.75	3072.6	3.2
2017-02-22	6.03	6.99	2.71	2.02	1998.03	2188.32	2211.56	2306.98	2366.08	2461.85	3002.72	3072.6	5.9
2017-02-23	5.92	6.99	2.62	1.95	1998.02	2188.32	2211.56	2306.97	2366.08	2461.84	3002.69	3072.56	1
2017-02-24	5.85	6.93	2.55	1.94	1998.02	2188.32	2211.56	2306.97	2366.08	2461.84	3002.67	3072.51	0
2017-02-25	5.85	6.75	2.42	1.94	1998.02	2188.31	2211.56	2306.96	2366.07	2461.84	3002.64	3072.46	0
2017-02-26	5.85	6.69	2.36	1.94	1998.02	2188.31	2211.56	2306.96	2366.07	2461.84	3002.61	3072.42	0
2017-02-27	5.85	6.58	2.36	1.93	1998.02	2188.3	2211.56	2306.96	2366.07	2461.84	3002.59	3072.38	0
2017-02-28	5.85	6.48	2.27	1.88	1998.02	2188.3	2211.56	2306.96	2366.07	2461.83	3002.56	3072.34	0
2017-03-01	5.85	6.38	2.17	1.88	1998.02	2188.29	2211.56	2306.95	2366.07	2461.83	3002.53	3072.31	0
2017-03-02	5.85	6.29	2.14	1.88	1998.02	2188.29	2211.56	2306.95	2366.07	2461.83	3002.5	3072.27	0
2017-03-03	5.84	6.33	2.15	1.83	1998.02	2188.29	2211.56	2306.95	2366.07	2461.82	3002.48	3072.24	0.4
2017-03-04	5.68	6.33	2.18	1.81	1998.01	2188.29	2211.56	2306.95	2366.07	2461.82	3002.45	3072.2	0
2017-03-05	5.76	6.49	2.19	1.74	1998.01	2188.3	2211.56	2306.95	2366.08	2461.81	3002.42	3072.17	3.4
2017-03-06	5.69	6.47	2.18	1.7	1998.01	2188.3	2211.56	2306.95	2366.08	2461.8	3002.39	3072.12	0.6
2017-03-07	5.68	6.38	2.18	1.7	1998.01	2188.29	2211.56	2306.95	2366.08	2461.8	3002.36	3072.08	0
2017-03-08	5.6	6.37	2.11	1.68	1998	2188.29	2211.56	2306.95	2366.08	2461.8	3002.34	3072.03	0
2017-03-09	5.52	6.34	2	1.67	1998	2188.29	2211.57	2306.94	2366.07	2461.79	3002.31	3071.98	0
2017-03-10	5.52	6.29	2	1.65	1998	2188.29	2211.57	2306.94	2366.07	2461.79	3002.28	3071.93	0.3
2017-03-11	5.52	6.29	2	1.64	1998	2188.29	2211.57	2306.94	2366.07	2461.79	3002.25	3071.88	0.8
2017-03-12	5.52	6.29	2	1.64	1998	2188.29	2211.57	2306.94	2366.07	2461.79	3002.23	3071.82	1
2017-03-13	5.52	6.29	2	1.65	1998	2188.29	2211.57	2306.94	2366.08	2461.79	3002.2	3071.77	1
2017-03-14	5.52	6.24	1.94	1.64	1998	2188.29	2211.57	2306.94	2366.07	2461.79	3002.18	3071.72	0
2017-03-15	5.52	6.14	1.85	1.6	1998	2188.28	2211.57	2306.93	2366.07	2461.78	3002.16	3071.67	0.8
2017-03-16	5.52	6.13	1.79	1.62	1998	2188.28	2211.57	2306.93	2366.06	2461.78	3002.13	3071.62	0
2017-03-17	5.57	6.11	1.75	1.65	1998	2188.28	2211.57	2306.92	2366.06	2461.79	3002.11	3071.57	0
2017-03-18	5.45	6.1	1.72	1.6	1997.99	2188.28	2211.57	2306.92	2366.07	2461.78	3002.08	3071.52	0.1
2017-03-19	5.35	6.09	1.65	1.59	1997.99	2188.28	2211.57	2306.92	2366.07	2461.78	3002.06	3071.47	0
2017-03-20	5.38	6.07	1.63	1.59	1997.99	2188.28	2211.57	2306.92	2366.08	2461.78	3002.04	3071.41	0.3
2017-03-21	5.38	6.07	1.63	1.59	1997.99	2188.28	2211.57	2306.92	2366.08	2461.78	3002.01	3071.35	2.3
2017-03-22	5.38	6.07	1.61	1.59	1997.99	2188.28	2211.57	2306.92	2366.07	2461.78	3001.99	3071.3	0.1
2017-03-23	5.38	6.07	1.53	1.59	1997.99	2188.28	2211.57	2306.91	2366.07	2461.78	3001.96	3071.29	0
2017-03-24	5.38	6.07	1.65	1.59	1997.99	2188.28	2211.52	2306.92	2366.08	2461.78	3001.94	3071.28	9.3
2017-03-25	5.38	6.07	1.65	1.55	1997.99	2188.28	2211.48	2306.92	2366.08	2461.77	3001.92	3071.22	0.3
2017-03-26	5.31	6.02	1.61	1.55	1997.98	2188.28	2211.43	2306.92	2366.08	2461.77	3001.89	3071.19	0
2017-03-27	5.25	5.9	1.49	1.56	1997.98	2188.27	2211.39	2306.91	2366.07	2461.77	3001.87	3071.14	0
2017-03-28	5.25	5.89	1.45	1.56	1997.98	2188.27	2211.35	2306.91	2366.07	2461.77	3001.85	3071.1	0
2017-03-29	5.26	6.02	1.52	1.55	1997.98	2188.28	2211.3	2306.91	2366.07	2461.77	3001.83	3071.08	0
2017-03-30	5.34	6.07	1.52	1.56	1997.99	2188.28	2211.26	2306.91	2366.07	2461.77	3001.8	3071.08	11.4
2017-03-31	5.31	6.09	1.54	1.55	1997.98	2188.28	2211.21	2306.91	2366.07	2461.77	3001.78	3071.04	0
2017-04-01	5.25	6.08	1.54	1.5	1997.98	2188.28	2211.16	2306.91	2366.07	2461.76	3001.76	3070.98	0
2017-04-02	5.25	6.07	1.55	1.46	1997.98	2188.28	2211.12	2306.91	2366.07	2461.75	3001.73	3070.96	0.3
2017-04-03	5.27	6.07	1.56	1.47	1997.98	2188.28	2211.07	2306.91	2366.07	2461.75	3001.71	3070.95	8
2017-04-04	5.26	6.02	1.48	1.45	1997.98	2188.28	2211.02	2306.91	2366.07	2461.75	3001.69	3070.9	2.3
2017-04-05	5.25	6.02	1.36	1.46	1997.98	2188.28	2210.98	2306.9	2366.07	2461.75	3001.67	3070.88	0.3
2017-04-06	5.25	6.11	1.53	1.48	1997.98	2188.28	2210.93	2306.91	2366.07	2461.75	3001.65	3070.83	0
2017-04-07	5.38	6.21	1.54	1.51	1997.99	2188.29	2210.89	2306.91	2366.07	2461.76	3001.63	3070.8	0
2017-04-08	5.38	6.24	1.52	1.51	1997.99	2188.29	2210.84	2306.91	2366.08	2461.76	3001.61	3070.77	2.8
2017-04-09	5.38	6.21	1.5	1.51	1997.99	2188.29	2210.79	2306.91	2366.08	2461.76	3001.59	3070.75	6.4
2017-04-10	5.39	6.22	1.51	1.54	1997.99	2188.29	2210.75	2306.91	2366.09	2461.77	3001.57	3070.72	7.4
2017-04-11	5.4	6.13	1.53	1.57	1997.99	2188.28	2210.7	2306.91	2366.09	2461.78	3001.56	3070.68	7
2017-04-12	5.38	6.07	1.44	1.61	1997.99	2188.28	2210.65	2306.91	2366.08	2461.78	3001.54	3070.64	0
2017-04-13	5.38	5.99	1.37	1.67	1997.99	2188.28	2210.61	2306.9	2366.08	2461.79	3001.53	3070.61	0
2017-04-14	5.38	5.96	1.41	1.73	1997.99	2188.27	2210.58	2306.91	2366.08	2461.8	3001.52	3070.6	0
2017-04-15	5.39	6.07	1.59	1.75	1997.99	2188.28	2210.62	2306.92	2366.08	2461.81	3001.5	3070.59	0.2
2017-04-16	5.55	6.17	1.76	1.75	1998	2188.28	2210.66	2306.93	2366.09	2461.81	3001.49	3070.58	24.7
2017-04-17	5.52	6.15	1.49	1.74	1998	2188.28	2210.69	2306.91	2366.08	2461.81	3001.48	3070.57	0
2017-04-18	5.53	6.14	1.53	1.78	1998	2188.28	2210.73	2306.91	2366.08	2461.81	3001.47	3070.55	0
2017-04-19	5.57	6.25	1.65	1.77	1998	2188.29	2210.77	2306.92	2366.08	2461.81	3001.45	3070.53	2.4
2017-04-20	5.52	6.35	1.79	1.76	1998	2188.29	2210.8	2306.93	2366.09	2461.81	3001.44	3070.51	0.6
2017-04-21	5.52	6.33	1.74	1.76	1998	2188.29	2210.84	2306.93	2366.09	2461.81	3001.43	3070.5	0.6
2017-04-22	5.52	6.24	1.61	1.81	1998	2188.29	2210.88	2306.92	2366.09	2461.82	3001.43	3070.5	0
2017-04-23	5.52	6.15	1.62	1.88	1998	2188.28	2210.92	2306.92	2366.08	2461.83	3001.42	3070.48	0
2017-04-24	5.52	6.19	1.68	1.91	1998	2188.29	2210.96	2306.92	2366.08	2461.83	3001.41	3070.48	0
2017-04-25	5.7	6.29	1.65	1.95	1998.01	2188.29	2210.99	2306.92	2366.09	2461.84	3001.4	3070.46	0.9
2017-04-26	5.72	6.29	1.76	1.95	1998.01	2188.29	2211.03	2306.93	2366.1	2461.84	3001.4	3070.45	12.7
2017-04-27	5.68	6.43	1.65	1.95	1998.01	2188.3	2211.07	2306.92	2366.09	2461.84	3001.39	3070.44	0.2
2017-04-28	5.64	6.29	1.58	1.98	1998.01	2188.29	2211.11	2306.92	2366.09	2461.84	3001.39	3070.42	0
2017-04-29	5.56	6.26	1.58	2.02	1998	2188.29	2211.14	2306.92	2366.09	2461.85	3001.38	3070.41	0
2017-04-30	5.67	6.29	1.72	2.01	1998.01	2188.29	2211.18	2306.92	2366.08	2461.85	3001.37	3070.39	0.7
2017-05-01	5.69	6.38	1.88	2.02	1998.01	2188.29	2211.22	2306.93	2366.09	2461.85	3001.37	3070.39	0
2017-05-02	5.87	6.43	1.95	2.04	1998.02	2188.3	2211.26	2306.94	2366.08	2461.85	3001.36	3070.38	1.8
2017-05-03	7.27	6.75	2.08	2.09	1998.08	2188.31	2211.3	2306.94	2366.09	2461.86	3001.36	3070.4	27.7
2017-05-04	6.95	6.85	2.05	2.16	1998.07	2188.31	2211.33	2306.94	2366.09	2461.87	3001.36	3070.43	5.7
2017-05-05	6.72	6.98	2.13	2.25	1998.06	2188.32	2211.37	2306.95	2366.09	2461.88	3001.37	3070.46	2.9
2017-05-06	6.53	6.99	2.18	2.35	1998.05	2188.32	2211.41	2306.95	2366.09	2461.89	3001.38	3070.49	2.2
2017-05-07	6.52	6.98	2.14	2.46	1998.05	2188.32	2211.44	2306.95	2366.09	2461.9	3001.39	3070.52	0.1
2017-05-08	6.52	6.99	2.2	2.6	1998.05	2188.32	2211.48	2306.95	2366.09	2461.92	3001.4	3070.53	0
2017-05-09	6.52	7.07	2.3	2.78	1998.05	2188.32	2211.52	2306.96	2366.09	2461.94	3001.42	3070.55	0
2017-05-10	6.74	7.17	2.47	2.84	1998.06	2188.33	2211.54	2306.97	2366.09	2461.94	3001.43	3070.58	3.7
2017-05-11	7.1	7.43	2.5	2.9	1998.08	2188.34	2211.53	2306.97	2366.1	2461.95	3001.45	3070.61	5.1
2017-05-12	7	7.29	2.43	2.94	1998.07	2188.33	2211.51	2306.96	2366.1	2461.95	3001.46	3070.61	0.1
2017-05-13	7.21	7.3	2.49	3	1998.08	2188.33	2211.51	2306.97	2366.1	2461.96	3001.48	3070.64	0.8
2017-05-14	7.21	7.47	2.65	3.05	1998.08	2188.34	2211.51	2306.98	2366.1	2461.97	3001.5	3070.67	5.2
2017-05-15	7.27	7.46	2.6	3.1	1998.08	2188.34	2211.51	2306.97	2366.09	2461.97	3001.51	3070.7	0.3
2017-05-16	7.45	7.52	2.62	3.1	1998.09	2188.34	2211.51	2306.97	2366.1	2461.97	3001.53	3070.73	0
2017-05-17	7.46	7.47	2.65	3.13	1998.09	2188.34	2211.5	2306.98	2366.12	2461.97	3001.55	3070.76	0.1
2017-05-18	7.48	7.56	2.71	3.19	1998.09	2188.34	2211.5	2306.98	2366.11	2461.98	3001.57	3070.79	0.3
2017-05-19	7.77	7.56	2.7	3.21	1998.1	2188.34	2211.5	2306.98	2366.11	2461.98	3001.58	3070.81	0
2017-05-20	7.9	7.65	2.8	3.2	1998.11	2188.35	2211.5	2306.98	2366.11	2461.98	3001.6	3070.82	0
2017-05-21	7.87	7.76	2.83	3.19	1998.11	2188.35	2211.5	2306.98	2366.11	2461.98	3001.62	3070.86	0
2017-05-22	8.91	8.05	2.91	3.19	1998.14	2188.36	2211.5	2306.99	2366.11	2461.98	3001.64	3070.9	12.6
2017-05-23	9.19	8.2	2.88	3.21	1998.15	2188.37	2211.5	2306.99	2366.11	2461.98	3001.67	3070.95	0
2017-05-24	8.8	8.21	2.88	3.3	1998.14	2188.37	2211.49	2306.99	2366.11	2461.99	3001.71	3071.01	0.2
2017-05-25	8.52	8.29	2.99	3.33	1998.13	2188.37	2211.49	2306.99	2366.12	2461.99	3001.73	3071.07	3.1
2017-05-26	8.52	8.36	3.08	3.44	1998.13	2188.37	2211.49	2307	2366.12	2462	3001.77	3071.12	0.3
2017-05-27	8.52	8.37	3.09	3.57	1998.13	2188.37	2211.49	2307	2366.12	2462.01	3001.81	3071.17	2.8
2017-05-28	8.58	8.37	3.16	3.55	1998.13	2188.37	2211.5	2307	2366.12	2462.01	3001.85	3071.22	0
2017-05-29	8.79	8.55	3.32	3.6	1998.14	2188.38	2211.5	2307.01	2366.1	2462.02	3001.88	3071.28	0.2
2017-05-30	8.81	8.66	3.39	3.59	1998.14	2188.38	2211.52	2307.01	2366.1	2462.02	3001.92	3071.35	0
2017-05-31	8.9	8.83	3.52	3.68	1998.14	2188.39	2211.54	2307.02	2366.1	2462.02	3001.97	3071.42	12
2017-06-01	9.99	9.33	3.69	3.72	1998.18	2188.41	2211.56	2307.03	2366.1	2462.03	3002.02	3071.5	15.4
2017-06-02	9.44	9.28	3.69	3.81	1998.16	2188.4	2211.57	2307.03	2366.1	2462.03	3002.07	3071.58	2.6
2017-06-03	10.1	9.66	3.65	3.89	1998.18	2188.41	2211.59	2307.03	2366.11	2462.04	3002.13	3071.68	12.8
2017-06-04	11	10.1	3.51	3.96	1998.21	2188.43	2211.61	2307.02	2366.11	2462.04	3002.19	3071.79	6.3
2017-06-05	10.9	10	3.67	3.97	1998.2	2188.43	2211.63	2307.03	2366.11	2462.04	3002.26	3071.91	0
2017-06-06	10.4	9.98	3.73	4.11	1998.19	2188.43	2211.63	2307.03	2366.11	2462.06	3002.34	3072.02	0
2017-06-07	10.4	10.1	3.91	4.2	1998.19	2188.43	2211.63	2307.04	2366.11	2462.06	3002.41	3072.13	0
2017-06-08	10.4	10.5	4.13	4.35	1998.19	2188.44	2211.64	2307.05	2366.12	2462.08	3002.49	3072.23	10.3
2017-06-09	11.9	11	4.28	4.46	1998.23	2188.46	2211.64	2307.06	2366.12	2462.09	3002.58	3072.35	10
2017-06-10	11.4	11	4.35	4.63	1998.22	2188.46	2211.65	2307.06	2366.12	2462.1	3002.66	3072.47	0
2017-06-11	11.4	11.2	4.55	4.83	1998.22	2188.46	2211.65	2307.08	2366.12	2462.12	3002.73	3072.58	0
2017-06-12	11.4	11.5	4.68	5	1998.22	2188.47	2211.66	2307.08	2366.12	2462.13	3002.81	3072.69	0
2017-06-13	11.4	11.8	4.84	5	1998.22	2188.48	2211.66	2307.09	2366.13	2462.13	3002.89	3072.79	2.1
2017-06-14	11.9	12.2	5.01	5.21	1998.23	2188.49	2211.67	2307.1	2366.13	2462.15	3002.97	3072.9	10.1
2017-06-15	12.4	12.3	5.08	5.28	1998.25	2188.5	2211.67	2307.1	2366.13	2462.15	3003.04	3073.02	2.2
2017-06-16	12.7	12.5	5.08	5.36	1998.25	2188.5	2211.67	2307.1	2366.13	2462.16	3003.1	3073.14	0
2017-06-17	12.5	12.6	5.23	5.49	1998.25	2188.51	2211.67	2307.11	2366.13	2462.17	3003.17	3073.28	1.3
2017-06-18	12.7	12.7	5.35	5.53	1998.26	2188.51	2211.67	2307.12	2366.13	2462.17	3003.24	3073.44	0.9
2017-06-19	12.7	12.8	5.38	5.56	1998.25	2188.51	2211.67	2307.12	2366.12	2462.17	3003.31	3073.58	0
2017-06-20	12.8	13	5.5	5.65	1998.26	2188.52	2211.67	2307.12	2366.12	2462.18	3003.38	3073.72	0.9
2017-06-21	12	13.1	5.58	5.69	1998.24	2188.52	2211.67	2307.13	2366.11	2462.18	3003.45	3073.85	0.1
2017-06-22	11.4	13.1	5.64	5.72	1998.22	2188.52	2211.67	2307.13	2366.11	2462.19	3003.52	3073.97	0
2017-06-23	12	13.1	5.67	5.73	1998.24	2188.52	2211.67	2307.13	2366.1	2462.19	3003.59	3074.09	0
2017-06-24	12.5	12.9	5.62	5.75	1998.25	2188.51	2211.67	2307.13	2366.11	2462.19	3003.66	3074.2	0
2017-06-25	12.5	12.8	5.6	5.67	1998.25	2188.51	2211.67	2307.13	2366.1	2462.18	3003.74	3074.29	0
2017-06-26	12.5	12.7	5.56	5.7	1998.25	2188.51	2211.67	2307.13	2366.1	2462.18	3003.79	3074.39	0
2017-06-27	12.5	12.6	5.57	5.6	1998.25	2188.51	2211.68	2307.13	2366.11	2462.18	3003.86	3074.47	0.3
2017-06-28	12.3	12.7	5.51	5.57	1998.25	2188.51	2211.68	2307.12	2366.1	2462.17	3003.94	3074.56	6.8
2017-06-29	12.6	12.7	5.49	5.56	1998.25	2188.51	2211.68	2307.12	2366.1	2462.17	3004.01	3074.65	9.4
2017-06-30	12.4	12.6	5.37	5.5	1998.25	2188.51	2211.68	2307.12	2366.1	2462.17	3004.08	3074.73	0
2017-07-01	12.2	12.5	5.26	5.52	1998.24	2188.5	2211.68	2307.11	2366.11	2462.17	3004.12	3074.8	0
2017-07-02	12.1	12.5	5.31	5.51	1998.24	2188.5	2211.69	2307.11	2366.12	2462.17	3004.14	3074.87	0
2017-07-03	12.1	12.5	5.36	5.47	1998.24	2188.5	2211.69	2307.12	2366.12	2462.17	3004.21	3074.94	3
2017-07-04	12.1	12.5	5.3	5.46	1998.24	2188.5	2211.69	2307.11	2366.12	2462.16	3004.29	3075	3.3
2017-07-05	12.1	12.6	5.34	5.42	1998.24	2188.51	2211.69	2307.11	2366.11	2462.16	3004.36	3075.06	6.4
2017-07-06	12.9	12.6	5.32	5.39	1998.26	2188.51	2211.69	2307.11	2366.11	2462.16	3004.4	3075.14	4.5
2017-07-07	12.3	12.5	5.23	5.45	1998.24	2188.5	2211.69	2307.11	2366.11	2462.16	3004.44	3075.21	0
2017-07-08	12.2	12.6	5.28	5.43	1998.24	2188.51	2211.69	2307.11	2366.12	2462.16	3004.5	3075.3	0.2
2017-07-09	12.2	12.6	5.37	5.47	1998.24	2188.51	2211.69	2307.12	2366.12	2462.17	3004.53	3075.38	0
2017-07-10	12.1	12.5	5.32	5.53	1998.24	2188.5	2211.69	2307.11	2366.12	2462.17	3004.52	3075.46	2.4
2017-07-11	12.1	12.5	5.3	5.5	1998.24	2188.5	2211.69	2307.11	2366.13	2462.17	3004.61	3075.54	2.3
2017-07-12	12.1	12.5	5.36	5.5	1998.24	2188.5	2211.69	2307.12	2366.13	2462.17	3004.66	3075.62	0
2017-07-13	12.1	12.5	5.33	5.42	1998.24	2188.5	2211.7	2307.11	2366.13	2462.16	3004.8	3075.69	0.7
2017-07-14	12.1	12.8	5.32	5.41	1998.24	2188.51	2211.69	2307.11	2366.12	2462.16	3004.84	3075.75	0.2
2017-07-15	12.1	12.8	5.28	5.39	1998.24	2188.51	2211.69	2307.11	2366.13	2462.16	3004.82	3075.81	2.9
2017-07-16	11.7	12.6	5.39	5.36	1998.23	2188.5	2211.69	2307.12	2366.13	2462.16	3004.86	3075.86	0
2017-07-17	11.7	12.3	5.24	5.25	1998.23	2188.5	2211.69	2307.11	2366.13	2462.15	3004.9	3075.9	3.8
2017-07-18	11.7	12	5.2	5.29	1998.23	2188.49	2211.69	2307.11	2366.12	2462.15	3004.96	3075.93	0
2017-07-19	11.5	11.9	5.1	5.23	1998.22	2188.48	2211.68	2307.1	2366.11	2462.15	3004.97	3075.96	0
2017-07-20	11.4	11.8	5.19	5.17	1998.22	2188.48	2211.69	2307.11	2366.11	2462.14	3004.99	3076	0
2017-07-21	11.4	11.7	5.29	5.14	1998.22	2188.48	2211.68	2307.11	2366.11	2462.14	3005.03	3076.02	0
2017-07-22	11.4	11.5	5.31	5.12	1998.22	2188.47	2211.69	2307.11	2366.11	2462.14	3005.06	3076.04	0
2017-07-23	11.2	11.4	5.24	5.05	1998.21	2188.47	2211.69	2307.11	2366.11	2462.13	3005.09	3076.06	0
2017-07-24	11	11	5.16	5.03	1998.21	2188.46	2211.69	2307.11	2366.11	2462.13	3005.12	3076.07	0
2017-07-25	10.9	10.7	5.1	4.91	1998.21	2188.45	2211.69	2307.1	2366.1	2462.12	3005.14	3076.07	0
2017-07-26	10.7	10.8	5.09	4.89	1998.2	2188.45	2211.7	2307.1	2366.1	2462.12	3005.14	3076.08	0
2017-07-27	10.7	10.7	5.08	4.87	1998.2	2188.45	2211.69	2307.1	2366.09	2462.12	3005.15	3076.08	0.3
2017-07-28	10.8	10.7	5.08	4.81	1998.2	2188.45	2211.71	2307.1	2366.09	2462.11	3005.17	3076.08	4.1
2017-07-29	11	10.7	5.07	4.8	1998.21	2188.45	2211.7	2307.1	2366.09	2462.11	3005.17	3076.1	1.9
2017-07-30	10.8	10.7	5	4.77	1998.2	2188.45	2211.69	2307.1	2366.09	2462.11	3005.17	3076.1	1.1
2017-07-31	10.7	10.5	4.93	4.72	1998.2	2188.44	2211.7	2307.09	2366.09	2462.11	3005.17	3076.1	0
2017-08-01	10.7	10.4	4.93	4.67	1998.2	2188.44	2211.69	2307.09	2366.08	2462.1	3005.17	3076.09	0
2017-08-02	10.7	10.4	4.98	4.63	1998.2	2188.44	2211.7	2307.1	2366.08	2462.1	3005.19	3076.09	12.5
2017-08-03	10.6	10.3	4.95	4.66	1998.2	2188.44	2211.7	2307.1	2366.08	2462.1	3005.19	3076.09	0
2017-08-04	10.4	10.3	5.12	4.66	1998.19	2188.43	2211.69	2307.1	2366.08	2462.1	3005.18	3076.09	0
2017-08-05	10.4	10.3	5.2	4.69	1998.19	2188.44	2211.69	2307.11	2366.08	2462.1	3005.18	3076.09	0
2017-08-06	10.5	10.4	5.21	4.65	1998.19	2188.44	2211.7	2307.11	2366.08	2462.1	3005.19	3076.09	4.5
2017-08-07	10.9	10.1	5.19	4.77	1998.2	2188.43	2211.71	2307.11	2366.08	2462.11	3005.21	3076.08	5
2017-08-08	11.3	15.3	5.13	4.83	1998.21	2188.5		2307.11	2366.06	2462.11	3005.21	3076.09	0
2017-08-09	13.2	10.6	3.97	4.78	1998.26	2188.44		2307.09	2366	2462.11	3005.35	3076.13	0
2017-08-10	11.1	10	4.33	5.3	1998.21	2188.43		2307.11	2366.01	2462.15	3005.15	3076.11	0
2017-08-11	11.8	11.7	4.77	6.09	1998.23	2188.48	2198.82	2307.12	2366.02	2462.21	3005	3076.1	0.6
2017-08-12	12.4	13	5.19	6.34	1998.25	2188.52	2198.82	2307.13	2366.04	2462.23	3004.91	3076.08	8
2017-08-13	12.5	13.5	5.43	6.59	1998.25	2188.53	2198.82	2307.14	2366.04	2462.25	3004.92	3076.07	0
2017-08-14	12.8	13.7	5.74	6.8	1998.26	2188.54	2198.82	2307.15	2366.05	2462.26	3004.87	3076.04	0
2017-08-15	13	14.3	5.81	6.85	1998.26	2188.55	2198.81	2307.15	2366.06	2462.27	3004.85	3076.01	0
2017-08-16	13.2	14.3	6.02	7.09	1998.27	2188.55	2198.81	2307.16	2366.06	2462.28	3004.85	3075.99	0
2017-08-17	13.3	13.9	6.08	7.31	1998.27	2188.54	2198.81	2307.16	2366.06	2462.3	3004.82	3075.97	14.7
2017-08-18	13.4	13.7	6.07	7.13	1998.27	2188.54	2198.8	2307.16	2366.06	2462.29	3004.83	3075.94	9.4
2017-08-19	13.4	13.4	5.94	7	1998.27	2188.53	2198.8	2307.16	2366.06	2462.28	3004.83	3075.92	0.6
2017-08-20	13.4	13.4	5.83	6.98	1998.27	2188.53	2198.8	2307.15	2366.06	2462.28	3004.81	3075.89	2.9
2017-08-21	13.7	13.3	5.88	7	1998.28	2188.53	2198.79	2307.15	2366.06	2462.28	3004.79	3075.86	3.5
2017-08-22	13.9	13.2	5.91	7.15	1998.28	2188.52	2198.79	2307.16	2366.05	2462.29	3004.77	3075.83	0
2017-08-23	14.4	13.3	5.97	7.16	1998.3	2188.53	2198.78	2307.16	2366.06	2462.29	3004.74	3075.8	0.2
2017-08-24	14.4	13.4	6.06	7.18	1998.3	2188.53	2198.78	2307.16	2366.06	2462.29	3004.72	3075.76	0
2017-08-25	14.4	13.3	6.05	7.17	1998.3	2188.53	2198.78	2307.16	2366.06	2462.29	3004.71	3075.72	0
2017-08-26	14.6	13.1	6.04	7.18	1998.31	2188.52	2198.77	2307.16	2366.06	2462.29	3004.68	3075.69	0
2017-08-27	14.6	13	6.16	7.24	1998.31	2188.52	2198.77	2307.16	2366.06	2462.29	3004.65	3075.66	0
2017-08-28	15.8	12.9	6.05	7.32	1998.34	2188.52	2198.77	2307.16	2366.06	2462.3	3004.63	3075.61	2
2017-08-29	15.2	12.9	6.1	7.37	1998.32	2188.51	2198.77	2307.16	2366.06	2462.3	3004.6	3075.58	1.2
2017-08-30	15.4	13.3	6.29	7.45	1998.32	2188.53	2198.77	2307.17	2366.05	2462.31	3004.57	3075.55	15.2
2017-08-31	15	12.8	6.78	7.42	1998.32	2188.51	2198.76	2307.18	2366.05	2462.31	3004.55	3075.52	0.1
2017-09-01	14.8	12.7	6.82	7.46	1998.31	2188.51	2198.76	2307.18	2366.05	2462.31	3004.52	3075.48	1.3
2017-09-02	14.8	12.7	6.9	7.53	1998.31	2188.51	2198.76	2307.18	2366.05	2462.31	3004.5	3075.45	0
2017-09-03	14.8	12.8	6.95	7.6	1998.31	2188.51	2198.76	2307.18	2366.05	2462.32	3004.48	3075.41	0.9
2017-09-04	14.8	13	6.77	7.61	1998.31	2188.52	2198.77	2307.18	2366.05	2462.32	3004.46	3075.38	8.5
2017-09-05	15.2	13.1	6.83	7.67	1998.32	2188.52	2198.77	2307.18	2366.05	2462.33	3004.43	3075.35	3.7
2017-09-06	15	12.9	6.7	7.69	1998.32	2188.52	2198.76	2307.18	2366.04	2462.33	3004.4	3075.32	0
2017-09-07	14.8	13.1	6.79	7.77	1998.31	2188.52	2198.77	2307.18	2366.04	2462.33	3004.38	3075.3	0
2017-09-08	15.5	13.5	7.06	7.8	1998.33	2188.53	2198.77	2307.19	2366.05	2462.33	3004.37	3075.3	13.7
2017-09-09	16.4	13.8	7.27	7.8	1998.35	2188.54	2198.78	2307.19	2366.05	2462.33	3004.37	3075.29	19.7
2017-09-10	16	13.5	7.11	7.78	1998.34	2188.53	2198.77	2307.19	2366.05	2462.33	3004.42	3075.3	0
2017-09-11	15.3	13.5	6.87	7.87	1998.32	2188.53	2198.77	2307.18	2366.05	2462.34	3004.48	3075.32	0
2017-09-12	15.3	13.6	6.87	7.84	1998.32	2188.53	2198.78	2307.18	2366.05	2462.34	3004.54	3075.34	0
2017-09-13	15.4	13.7	7.09	7.91	1998.32	2188.54	2198.78	2307.19	2366.05	2462.34	3004.6	3075.37	7.1
2017-09-14	15.7	14	7.22	7.81	1998.33	2188.55	2198.79	2307.19	2366.05	2462.33	3004.65	3075.39	3.1
2017-09-15	15.7	14.1	7.2	7.82	1998.33	2188.55	2198.78	2307.19	2366.05	2462.34	3004.7	3075.42	0.1
2017-09-16	15.6	14.1	7.3	7.94	1998.33	2188.55	2198.77	2307.19	2366.06	2462.34	3004.76	3075.45	0.7
2017-09-17	15.7	14.1	7.37	8.03	1998.33	2188.55	2198.78	2307.19	2366.06	2462.35	3004.82	3075.49	0.2
2017-09-18	16.3	14.5	7.34	8.16	1998.35	2188.56	2198.78	2307.19	2366.07	2462.36	3004.88	3075.54	7.4
2017-09-19	16.9	14.6	7.2	8.18	1998.36	2188.56	2198.78	2307.19	2366.06	2462.36	3004.93	3075.6	2.9
2017-09-20	16.7	14.6	7.33	8.26	1998.36	2188.56	2198.78	2307.19	2366.06	2462.37	3004.99	3075.67	0.6
2017-09-21	16.4	14.8	7.36	8.44	1998.35	2188.57	2198.78	2307.19	2366.06	2462.38	3005.05	3075.75	0.2
2017-09-22	16.4	15	7.76	8.86	1998.35	2188.57	2198.79	2307.21	2366.07	2462.41	3005.09	3075.84	0.9
2017-09-23	16.4	15.3	8.16	9.19	1998.35	2188.58	2198.79	2307.21	2366.07	2462.43	3005.15	3075.93	0
2017-09-24	16.6	15.7	8.55	9.49	1998.36	2188.59	2198.81	2307.22	2366.09	2462.45	3005.21	3076.01	4.2
2017-09-25	17.2	16.2	8.25	9.57	1998.37	2188.61	2198.81	2307.22	2366.09	2462.45	3005.27	3076.1	9.7
2017-09-26	18.4	16.6	8.72	9.69	1998.4	2188.62	2198.82	2307.23	2366.09	2462.46	3005.32	3076.2	16.8
2017-09-27	20.7	17.4	9.48	9.77	1998.46	2188.64	2198.84	2307.25	2366.1	2462.46	3005.38	3076.36	25.8
2017-09-28	19.7	17.8	10.1	10	1998.43	2188.66	2198.85	2307.27	2366.1	2462.48	3005.44	3076.6	0
2017-09-29	19.8	18.6	10.7	9.89	1998.43	2188.68	2198.86	2307.28	2366.11	2462.47	3005.5	3076.88	4.7
2017-09-30	19.9	19.1	11	9.86	1998.44	2188.69	2198.87	2307.29	2366.11	2462.47	3005.54	3077.12	5.4
2017-10-01	19.8	19.2	11.1	9.75	1998.43	2188.69	2198.87	2307.29	2366.11	2462.46	3005.6	3077.32	13.4
2017-10-02	19.4	18.5	11.1	9.41	1998.43	2188.67	2198.86	2307.29	2366.11	2462.44	3005.66	3077.47	1
2017-10-03	20.7	18.7	11.1	9.18	1998.46	2188.68	2198.86	2307.29	2366.11	2462.43	3005.71	3077.61	23.6
2017-10-04	21.1	18.9	11.2	9.41	1998.47	2188.68	2198.87	2307.29	2366.12	2462.44	3005.77	3077.74	24.2
2017-10-05	21	18.7	11.2	9.44	1998.46	2188.68	2198.87	2307.29	2366.11	2462.44	3005.83	3077.84	3
2017-10-06	20.9	18.8	11.3	9.6	1998.46	2188.68	2198.87	2307.29	2366.12	2462.45	3005.89	3077.95	1
2017-10-07	20.9	18.9	11.2	9.53	1998.46	2188.68	2198.87	2307.29	2366.12	2462.45	3005.94	3078.04	0
2017-10-08	20.8	18.9	11.1	9.37	1998.46	2188.68	2198.87	2307.29	2366.12	2462.44	3005.99	3078.13	0
2017-10-09	20.6	18.6	11	9.2	1998.45	2188.68	2198.87	2307.29	2366.11	2462.43	3006.05	3078.2	0.4
2017-10-10	20.5	18.5	11	9.08	1998.45	2188.67	2198.86	2307.29	2366.11	2462.42	3006.1	3078.26	21
2017-10-11	20.2	18.3	10.7	9.01	1998.44	2188.67	2198.86	2307.28	2366.11	2462.42	3006.16	3078.31	26.8
2017-10-12	19.6	18.1	10.7	8.83	1998.43	2188.67	2198.86	2307.28	2366.1	2462.4	3006.22	3078.35	3.8
2017-10-13	19.7	17.9	10.3	8.73	1998.43	2188.66	2198.85	2307.27	2366.1	2462.4	3006.28	3078.38	4.6
2017-10-14	19.7	18.1	10	8.68	1998.43	2188.66	2198.77	2307.26	2366.1	2462.39	3006.33	3078.41	12.6
2017-10-15	20.1	18.3	10.3	8.66	1998.44	2188.67	2198.51	2307.27	2366.1	2462.39	3006.39	3078.43	33.4
2017-10-16	19.6	18.1	10.2	8.61	1998.43	2188.66	2198.46	2307.27	2366.1	2462.39	3006.44	3078.45	5.6
2017-10-17	19.5	17.6	10.2	8.57	1998.43	2188.65	2198.45	2307.27	2366.1	2462.39	3006.5	3078.46	0.5
2017-10-18	19.6	17.7	10.2	8.6	1998.43	2188.65	2198.44	2307.27	2366.1	2462.39	3006.55	3078.46	1.1
2017-10-19	19.6	17.7	10.3	8.63	1998.43	2188.66	2198.43	2307.27	2366.11	2462.39	3006.59	3078.47	0
2017-10-20	19.6	17.8	10.2	8.53	1998.43	2188.66	2198.43	2307.27	2366.11	2462.38	3006.6	3078.47	0
2017-10-21	19.7	18.1	10.3	8.56	1998.43	2188.67	2198.42	2307.27	2366.12	2462.39	3006.58	3078.48	9.2
2017-10-22	19.6	18.1	10.4	8.51	1998.43	2188.66	2198.43	2307.27	2366.11	2462.38	3006.6	3078.49	10.7
2017-10-23	19.2	17.9	10.2	8.4	1998.42	2188.66	2198.42	2307.27	2366.11	2462.38	3006.6	3078.49	0
2017-10-24	18.9	17.7	10.1	8.32	1998.41	2188.65	2198.41	2307.26	2366.11	2462.37	3006.6	3078.48	0
2017-10-25	19.2	17.5	10.1	8.31	1998.42	2188.65	2198.42	2307.26	2366.11	2462.37	3006.6	3078.48	4.5
2017-10-26	19.1	17.5	10.2	8.31	1998.42	2188.65	2198.42	2307.27	2366.1	2462.37	3006.59	3078.48	1.8
2017-10-27	18.8	17.5	9.9	8.23	1998.41	2188.64	2198.41	2307.26	2366.1	2462.36	3006.59	3078.48	0
2017-10-28	18.8	17.3	9.99	8.17	1998.41	2188.64	2198.41	2307.26	2366.1	2462.36	3006.59	3078.47	0
2017-10-29	18.7	17.5	9.75	8.09	1998.41	2188.64	2198.41	2307.26	2366.1	2462.35	3006.6	3078.45	0.1
2017-10-30	18.4	17.4	9.82	7.98	1998.4	2188.64	2198.4	2307.26	2366.1	2462.35	3006.6	3078.43	0
2017-10-31	18.4	17.4	9.66	7.98	1998.4	2188.64	2198.4	2307.25	2366.1	2462.35	3006.59	3078.42	5.1
2017-11-01	18.4	17.4	9.54	7.99	1998.4	2188.64	2198.41	2307.25	2366.1	2462.35	3006.58	3078.41	4.3
2017-11-02	18.2	17.1	9.39	7.89	1998.4	2188.63	2198.4	2307.25	2366.1	2462.34	3006.56	3078.4	0.1
2017-11-03	18	17	9.36	7.8	1998.39	2188.63	2198.39	2307.25	2366.1	2462.33	3006.55	3078.37	0.1
2017-11-04	17.9	17.1	9.11	7.67	1998.39	2188.63	2198.39	2307.24	2366.09	2462.32	3006.53	3078.35	0.1
2017-11-05	17.6	17	9.07	7.57	1998.38	2188.63	2198.39	2307.24	2366.09	2462.32	3006.51	3078.33	0
2017-11-06	17.6	16.9	8.91	7.62	1998.38	2188.63	2198.38	2307.23	2366.09	2462.32	3006.49	3078.3	0
2017-11-07	17.3	16.7	8.84	7.59	1998.37	2188.62	2198.35	2307.23	2366.09	2462.32	3006.46	3078.26	0
2017-11-08	17.2	16.7	8.96	7.52	1998.37	2188.62	2198.35	2307.24	2366.09	2462.32	3006.45	3078.23	0
2017-11-09	17.2	17	8.88	7.46	1998.37	2188.63	2198.35	2307.23	2366.09	2462.31	3006.44	3078.2	0
2017-11-10	17.2	17	8.86	7.39	1998.37	2188.63	2198.34	2307.23	2366.09	2462.31	3006.4	3078.17	0
2017-11-11	17	16.9	8.86	7.33	1998.36	2188.63	2198.34	2307.23	2366.09	2462.3	3006.37	3078.13	0
2017-11-12	16.8	16.7	8.68	7.31	1998.36	2188.62	2198.34	2307.23	2366.09	2462.3	3006.35	3078.09	0
2017-11-13	16.7	16.6	8.66	7.26	1998.36	2188.62	2198.34	2307.23	2366.09	2462.3	3006.32	3078.06	0
2017-11-14	16.5	16.5	8.68	7.23	1998.35	2188.62	2198.34	2307.23	2366.09	2462.29	3006.28	3078.03	0
2017-11-15	16.4	16.4	8.59	7.19	1998.35	2188.61	2198.33	2307.23	2366.09	2462.29	3006.25	3077.99	0
2017-11-16	16.4	16.4	8.69	7.13	1998.35	2188.61	2198.33	2307.23	2366.09	2462.29	3006.21	3077.94	0
2017-11-17	16.1	16.3	8.69	7.05	1998.34	2188.61	2198.33	2307.23	2366.09	2462.28	3006.18	3077.89	0.1
2017-11-18	16	16.3	8.49	7.01	1998.34	2188.61	2198.32	2307.22	2366.09	2462.28	3006.14	3077.84	0
2017-11-19	16	16.3	8.55	6.9	1998.34	2188.61	2198.32	2307.23	2366.08	2462.27	3006.11	3077.79	0
2017-11-20	16	16	8.31	6.86	1998.34	2188.6	2198.31	2307.22	2366.08	2462.27	3006.07	3077.76	0
2017-11-21	16	16	8.34	6.79	1998.34	2188.6	2198.32	2307.22	2366.08	2462.26	3006.03	3077.69	1.9
2017-11-22	16	15.9	8.34	6.72	1998.34	2188.6	2198.32	2307.22	2366.08	2462.26	3005.99	3077.62	1.7
2017-11-23	15.9	15.8	8.18	6.72	1998.34	2188.6	2198.31	2307.22	2366.08	2462.26	3005.96	3077.57	2.2
2017-11-24	15.8	15.5	7.96	6.62	1998.33	2188.59	2198.31	2307.21	2366.08	2462.25	3005.92	3077.57	0
2017-11-25	15.6	15.2	7.96	6.55	1998.33	2188.58	2198.31	2307.21	2366.07	2462.24	3005.88	3077.51	0
2017-11-26	15.5	15	7.85	6.51	1998.33	2188.57	2198.3	2307.21	2366.07	2462.24	3005.85	3077.45	0
2017-11-27	15.3	15	7.72	6.44	1998.32	2188.57	2198.3	2307.2	2366.07	2462.24	3005.8	3077.39	0
2017-11-28	15.2	14.9	7.71	6.32	1998.32	2188.57	2198.29	2307.2	2366.07	2462.23	3005.76	3077.35	0
2017-11-29	15.2	14.8	7.62	6.35	1998.32	2188.57	2198.29	2307.2	2366.07	2462.23	3005.72	3077.29	1.3
2017-11-30	15.2	14.8	7.66	6.3	1998.32	2188.57	2198.29	2307.2	2366.07	2462.23	3005.68	3077.25	1.2
2017-12-01	15.2	14.8	7.59	6.24	1998.32	2188.57	2198.29	2307.2	2366.07	2462.22	3005.63	3077.18	0
2017-12-02	15.2	14.8	7.58	6.19	1998.32	2188.57	2198.28	2307.2	2366.07	2462.22	3005.59	3077.14	0
2017-12-03	15.1	15.1	7.54	6.17	1998.32	2188.58	2198.28	2307.2	2366.07	2462.22	3005.54	3077.08	0
2017-12-04	15.1	14.9	7.4	6.12	1998.32	2188.57	2198.28	2307.2	2366.06	2462.21	3005.5	3077.02	0
2017-12-05	14.8	14.9	7.46	6.07	1998.31	2188.57	2198.27	2307.2	2366.06	2462.21	3005.46	3076.95	0
2017-12-06	14.8	15	7.34	6.04	1998.31	2188.58	2198.27	2307.19	2366.06	2462.21	3005.41	3076.89	0
2017-12-07	14.7	14.9	7.28	5.99	1998.31	2188.57	2198.27	2307.19	2366.06	2462.21	3005.37	3076.85	0
2017-12-08	14.5	14.9	7.29	5.97	1998.3	2188.57	2198.26	2307.19	2366.06	2462.2	3005.32	3076.79	0
2017-12-09	14.4	14.8	7.29	5.79	1998.3	2188.57	2198.26	2307.19	2366.06	2462.19	3005.27	3076.73	0
2017-12-10	14.4	14.6	7.24	5.72	1998.3	2188.56	2198.26	2307.19	2366.06	2462.18	3005.22	3076.68	0
2017-12-11	14.4	14.6	7.11	5.68	1998.3	2188.56	2198.25	2307.19	2366.06	2462.18	3005.18	3076.61	0
2017-12-12	14.4	14.5	7.27	5.64	1998.3	2188.56	2198.25	2307.19	2366.06	2462.18	3005.13	3076.56	0
2017-12-13	14.2	14.5	7.16	5.59	1998.29	2188.56	2198.25	2307.19	2366.06	2462.18	3005.09	3076.5	0
2017-12-14	14	14.5	7.11	5.58	1998.29	2188.56	2198.25	2307.19	2366.06	2462.17	3005.05	3076.45	0
2017-12-15	14	14.5	7.12	5.5	1998.29	2188.56	2198.25	2307.19	2366.06	2462.17	3005.01	3076.39	0
2017-12-16	13.8	14.4	7.13	5.45	1998.28	2188.56	2198.24	2307.19	2366.06	2462.16	3004.96	3076.32	0
2017-12-17	13.7	14.3	7.2	5.42	1998.28	2188.55	2198.24	2307.19	2366.06	2462.16	3004.91	3076.29	0
2017-12-18	13.6	14.1	7.3	5.4	1998.28	2188.55	2198.24	2307.19	2366.06	2462.16	3004.86	3076.24	0
2017-12-19	13.6	14	7.48	5.4	1998.28	2188.54	2198.24	2307.2	2366.06	2462.16	3004.8	3076.18	0
2017-12-20	13.6	13.8	7.24	5.36	1998.28	2188.54	2198.23	2307.19	2366.07	2462.16	3004.76	3076.12	0
2017-12-21	13.6	13.8	7.06	5.33	1998.28	2188.54	2198.23	2307.18	2366.06	2462.15	3004.72	3076.06	0
2017-12-22	13.6	13.8	7.31	5.32	1998.28	2188.54	2198.23	2307.19	2366.06	2462.16	3004.68	3076	0
2017-12-23	13.6	13.6	7.18	5.32	1998.28	2188.53	2198.23	2307.19	2366.06	2462.15	3004.64	3075.94	0
2017-12-24	13.5	13.4	7.1	5.25	1998.28	2188.53	2198.22	2307.19	2366.06	2462.15	3004.59	3075.88	0
2017-12-25	13.4	13.3	6.95	5.21	1998.27	2188.53	2198.22	2307.18	2366.06	2462.14	3004.55	3075.82	0
2017-12-26	13.3	13.2	6.95	5.21	1998.27	2188.52	2198.22	2307.18	2366.06	2462.15	3004.5	3075.76	0
2017-12-27	13.3	13.1	6.9	5.18	1998.27	2188.52	2198.21	2307.18	2366.06	2462.14	3004.46	3075.7	0
2017-12-28	13.3	13.1	6.83	5.14	1998.27	2188.52	2198.21	2307.18	2366.06	2462.14	3004.42	3075.64	0
2017-12-29	13.3	12.9	6.79	5.08	1998.27	2188.51	2198.2	2307.18	2366.06	2462.14	3004.37	3075.59	0
2017-12-30	13.3	12.8	6.77	5.02	1998.27	2188.51	2198.2	2307.18	2366.06	2462.13	3004.33	3075.53	0
2017-12-31	13.3	12.7	6.74	4.99	1998.27	2188.51	2198.2	2307.18	2366.05	2462.13	3004.28	3075.47	0
